# Supplementary material for: PRMT5-mediated methylation of YBX1 regulates NF-κB activity in colorectal cancer
Source: PubMed Central journal article supplement (PMC7522246; doi:10.1038/s41598-020-72942-3), 2020-09-28

## **PRMT5-mediated methylation of YBX1 regulates NF- $\kappa$ B activity in colorectal cancer**

Antja-Voy Hartley<sup>1</sup>, Benlian Wang<sup>2</sup>, Rasika Mundade<sup>1</sup>, Guanglong Jiang<sup>4</sup>, Mengyao Sun<sup>1</sup>, Han Wei<sup>1</sup>, Steven Sun<sup>1</sup>, Yunlong Liu<sup>4</sup> & Tao Lu<sup>\*1,3,4</sup>.

<sup>1</sup> Department of Pharmacology & Toxicology, Indiana University School of Medicine, Indianapolis, IN; <sup>2</sup>Case Western Reserve University, Cleveland, OH; <sup>3</sup>Department of Biochemistry & Molecular Biology, Indiana University School of Medicine, Indianapolis, IN; <sup>4</sup>Department of Medical & Molecular Genetics, Indiana University School of Medicine, Indianapolis, IN

\*Corresponding author:

Tao Lu: Department of Pharmacology and Toxicology, Indiana University School of Medicine, 635 Barnhill Drive, Indianapolis, IN 46202, USA

Tel: 317-278-0520

Fax: 317-274-7714

Email: [lut@iu.edu](mailto:lut@iu.edu)

Running title: PRMT5 methylates YBX1 at R205

NON-PUBLISHED SUPPLEMENTAL INFORMATION

**FIGURE 2A –** WB: Anti-YBX1 and Anti-beta-actin

**HEK293: Anti-YBX1 (left)**

**HT29: Anti-YBX1 (middle)**

**HT29 and HEK293, respectively: Anti-beta-actin (right)**

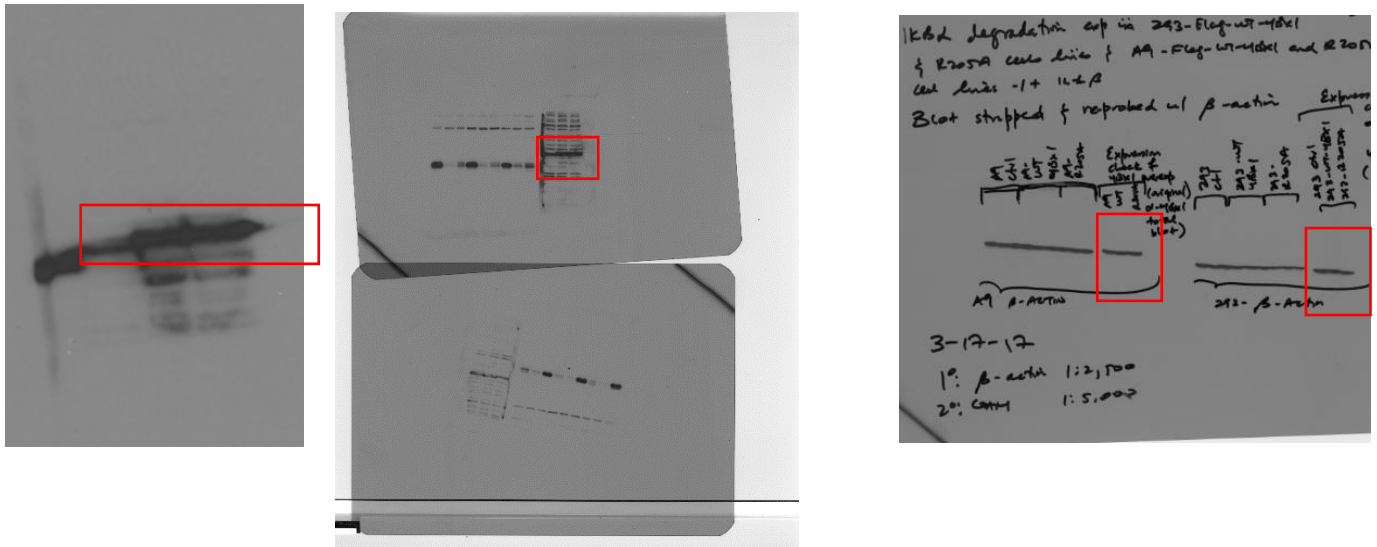

**FIGURE 2B HEK293-** IP: Anti-SDMA and IP: Anti-Myc (-/+ IL-1) were cropped from the same blot (10 sec exposure) stripped and reprobed with Anti-Myc. Input: Anti-Myc and Input: Anti-YBX1 were developed from different blots. Blots were developed along with multiple blots on the same film. Relevant parts of each blot are shown.

**IP: Anti-SDMA (-/+ IL-1) (top left)**

**IP: Anti-Myc (-/+ IL-1) (top right)**

**Input: Anti-Myc (-/+ IL-1) (bottom left)**

**Input: Anti-YBX1 (-/+ IL-1) (bottom right)**

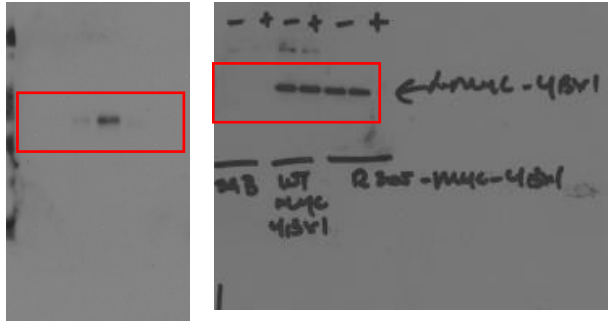

Short exposure

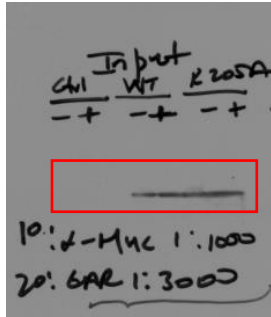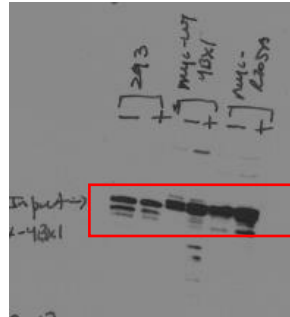

Long exposure

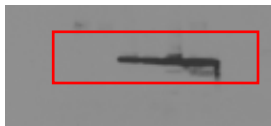

**FIGURE 2B HT29** - IP: Anti-SDMA and IP: Anti-Myc (-/+ IL-1) were cropped from the same blot (10 sec exposure) stripped and reprobbed with Anti-Myc. Input: Anti-Myc and Input: Anti-YBX1 were developed from different blots. Blots were developed along with multiple blots on the same film. Relevant parts of each blot are shown.

**IP: Anti-SDMA (-/+ IL-1) (top left)**

**IP: Anti-Myc (-/+ IL-1) (top right)**

**Input: Anti-Myc (-/+ IL-1) (bottom left)**

**Input: Anti-YBX1 (-/+ IL-1) (bottom right)**

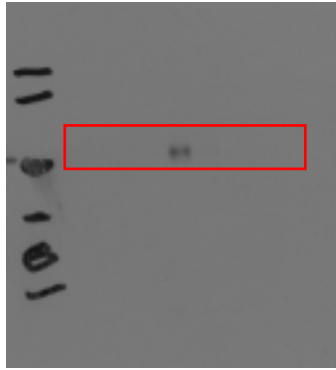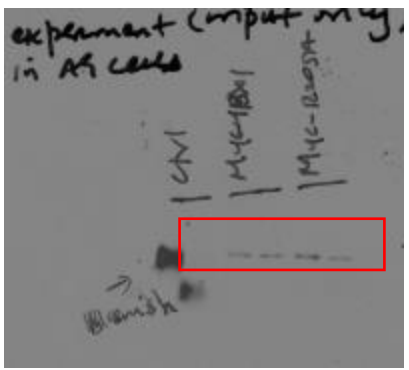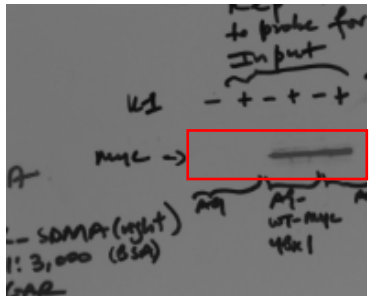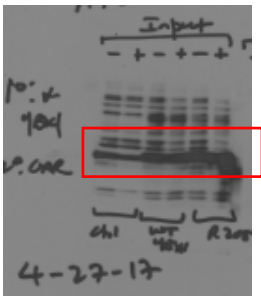

**FIGURE 3A** - IP: Anti-Myc and Input: Anti-Myc (-/+ IL-1) were cropped from the same blot (2 sec exposure) while the IP: Anti-Flag image was developed from the same blot that was stripped and re-probed with anti-Flag antibody (10sec exposure).

**IP: Anti-Myc and Input: Anti-Myc (-/+ IL-1) (left)**

**IP: Anti-Flag (-/+ IL-1) (right)**

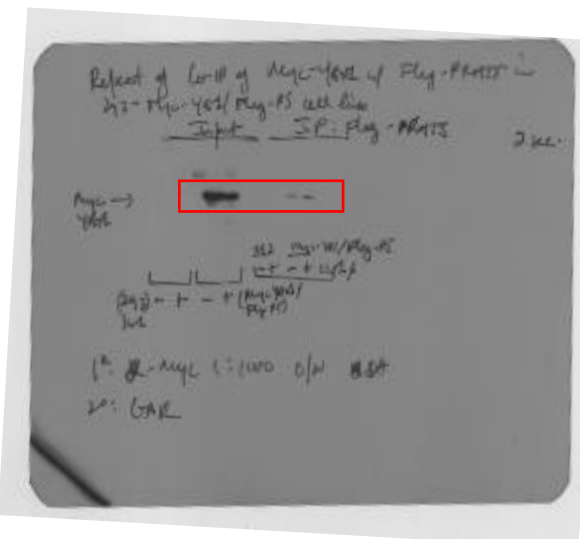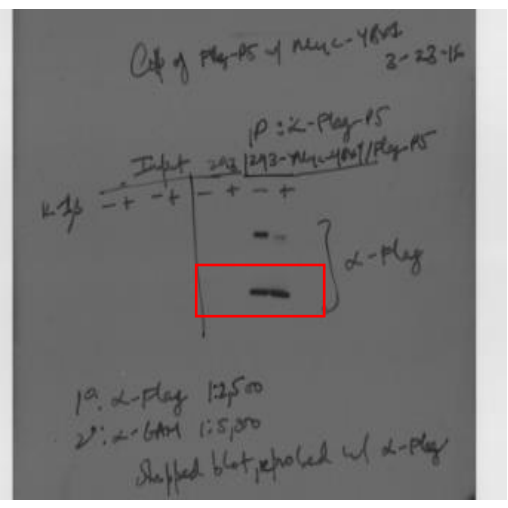

**FIGURE 3B** – Images were developed on blots with multiple other blots. Relevant part(s) of the blots shown. IP: Anti-Myc and Input: Anti-Myc (-/+ IL-1) were cropped from two different blots (1min exposure) while the IP: Anti-Flag image was developed from the same blot as IP: Anti-Myc that was stripped and re-probed with Anti-Flag antibody (1 min exposure). Note: samples were run alongside Myc-R205A samples which are shown in blots below but not in the main text Figures.

**IP: Anti-Myc (-/+ IL-1) (left)**

**IP: Anti-Flag (-/+ IL-1) (middle)**

**Input: Anti-Myc (-/+ IL-1) (right)**

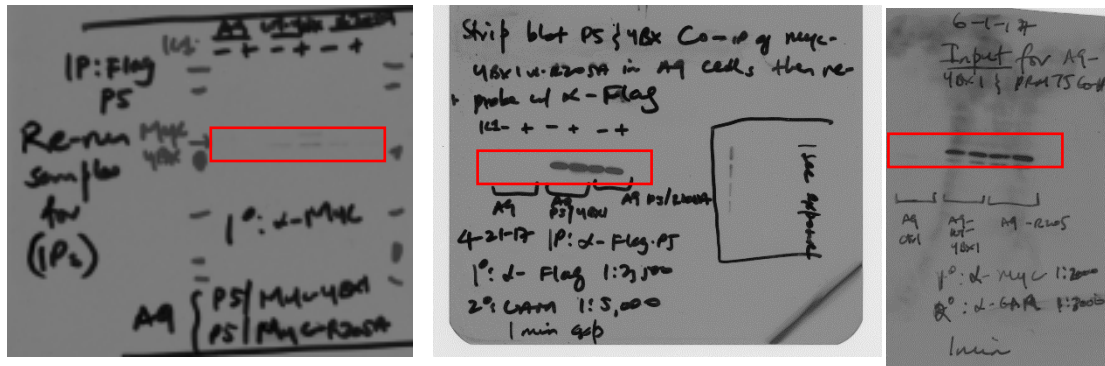

**FIGURE 3C**

(Left) Images were developed same blot as other samples. Relevant part(s) of the blots shown. WB: anti-PRMT5. The (right) WB for anti-actin was obtained from same blot stripped and re-probed.

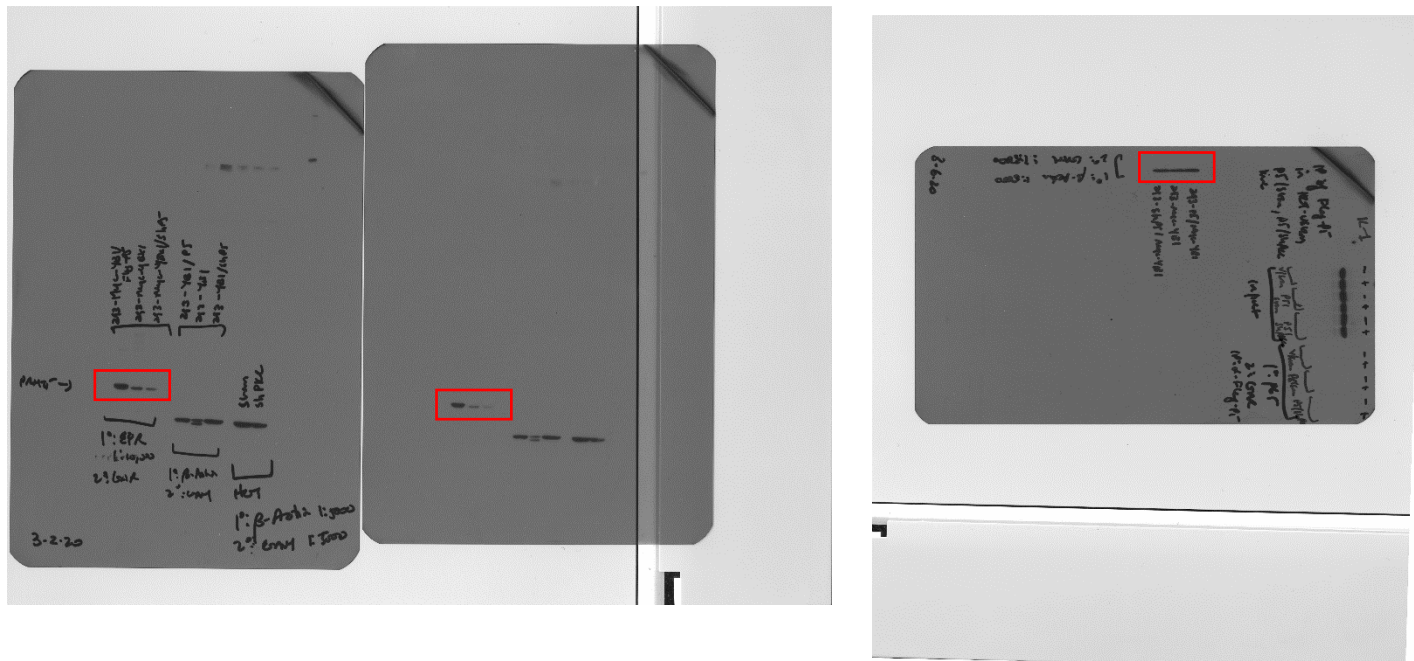

### **FIGURE 3D**

Images were developed on blots with multiple other blots. Relevant part(s) of the blots shown. IP: Anti-SDMA and Input: Anti-Myc (-/+ IL-1) were cropped from two different blots (1min) while the IP: Anti-YBX1 image was developed from the same blot as Input: Anti-Myc that was stripped and re-probed with Anti-YBX1 antibody (1 min exposure). The IP: Anti-Myc image was obtained from the IP: Anti-SDMA blot that was stripped and re-probed with Anti-Myc antibody.

**IP: Anti-SDMA (-/+ IL-1) (top left)**

**IP: Anti-Myc (-/+ IL-1) (top right, long and short exposure)**

**Input: Anti-Myc (-/+ IL-1) (bottom left)**

**Input: Anti-YBX1 (-/+ IL-1) (bottom right)**

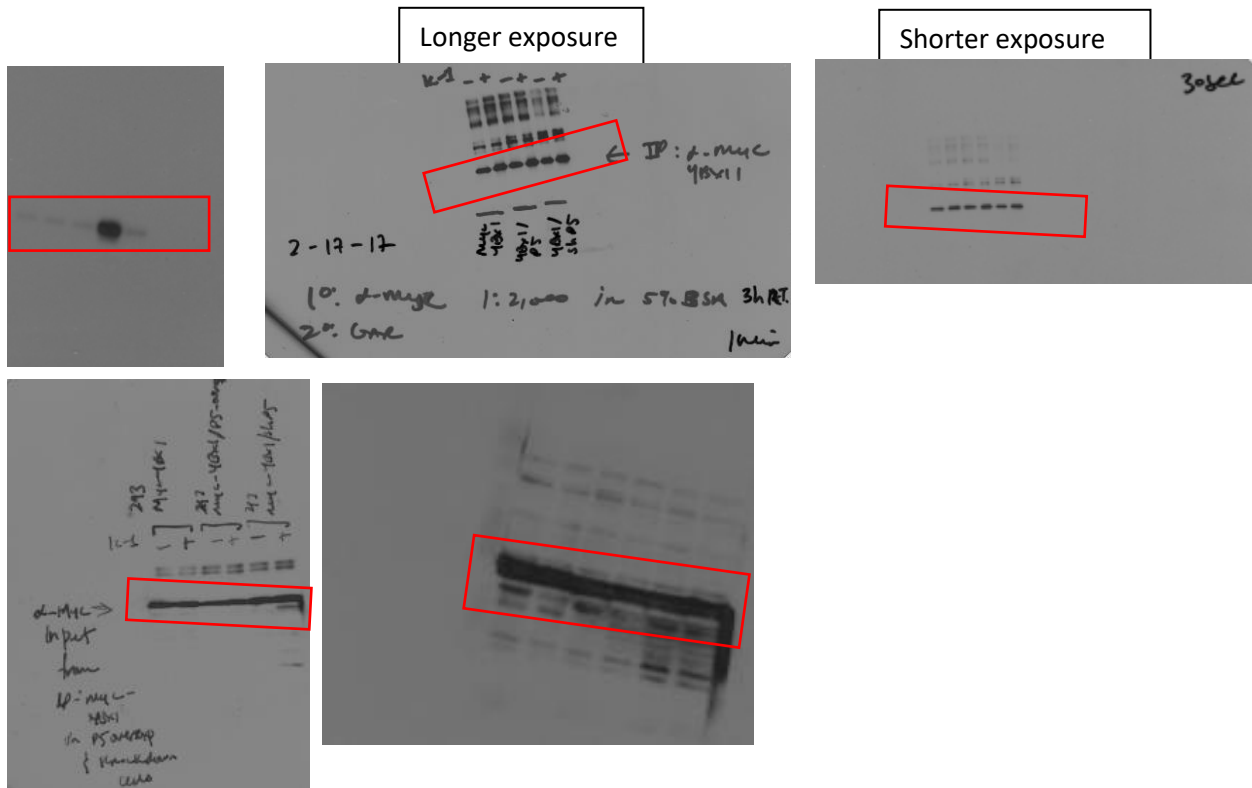

**FIGURE 4B (HEK293) - IP: Anti-p65 and IP: Anti-Flag (-/+ IL-1) were cropped from the same blot (30 sec exposure) that was stripped and re-probed with Anti-Flag. Input: Anti-p65 image was developed from a different blot (10sec exposure). Blots were developed with other blots on the same film and the relevant part of each blot is shown.**

**IP: Anti-p65 (-/+ IL-1) (left)**

**IP: Anti-Flag (-/+ IL-1) (middle)**

**Input: Anti-p65 (-/+ IL-1) (right)**

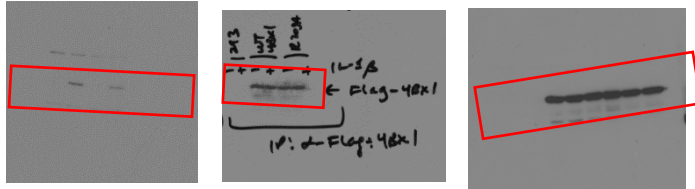

**FIGURE 4B (HT29)** - IP: Anti-p65 and IP: Anti-Flag (-/+ IL-1) were cropped from the same blot (30 sec exposure) that was stripped and re-probed with Anti-Flag. Input: Anti-p65 image was developed from a different blot (10sec exposure). Blots were developed with other blots on the same film and the relevant part of each blot is shown.

**IP: Anti-p65 (-/+ IL-1) (left)**

**IP: Anti-Flag (-/+ IL-1) (middle)**

**Input: Anti-p65 (right)**

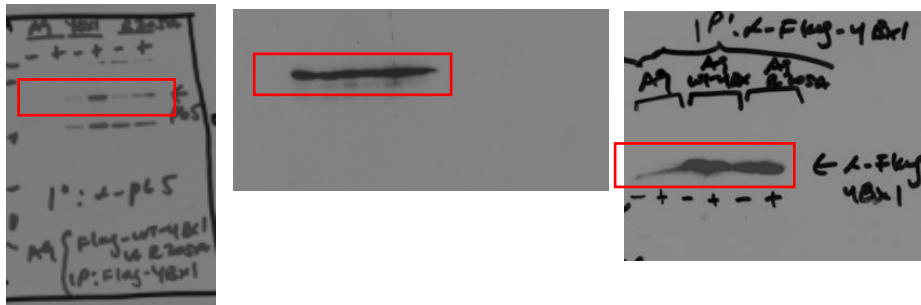

Supplement: 41598_2020_72942_MOESM1_ESM.pdf [file 41598_2020_72942_MOESM1_ESM.pdf]
