# Supplementary material for: PRMT5-mediated methylation of YBX1 regulates NF-κB activity in colorectal cancer
Source: PubMed Central journal article supplement (PMC7522246; doi:10.1038/s41598-020-72942-3), 2020-09-28

**PRMT5-mediated methylation of YBX1 regulates NF- $\kappa$ B activity in colorectal cancer**

Antja-Voy Hartley<sup>1</sup>, Benlian Wang<sup>2</sup>, Rasika Mundade<sup>1</sup>, Guanglong Jiang<sup>4</sup>, Mengyao Sun<sup>1</sup>, Han Wei<sup>1</sup>, Steven Sun<sup>1</sup>, Yunlong Liu<sup>4</sup> & Tao Lu<sup>\*1,3,4</sup>.

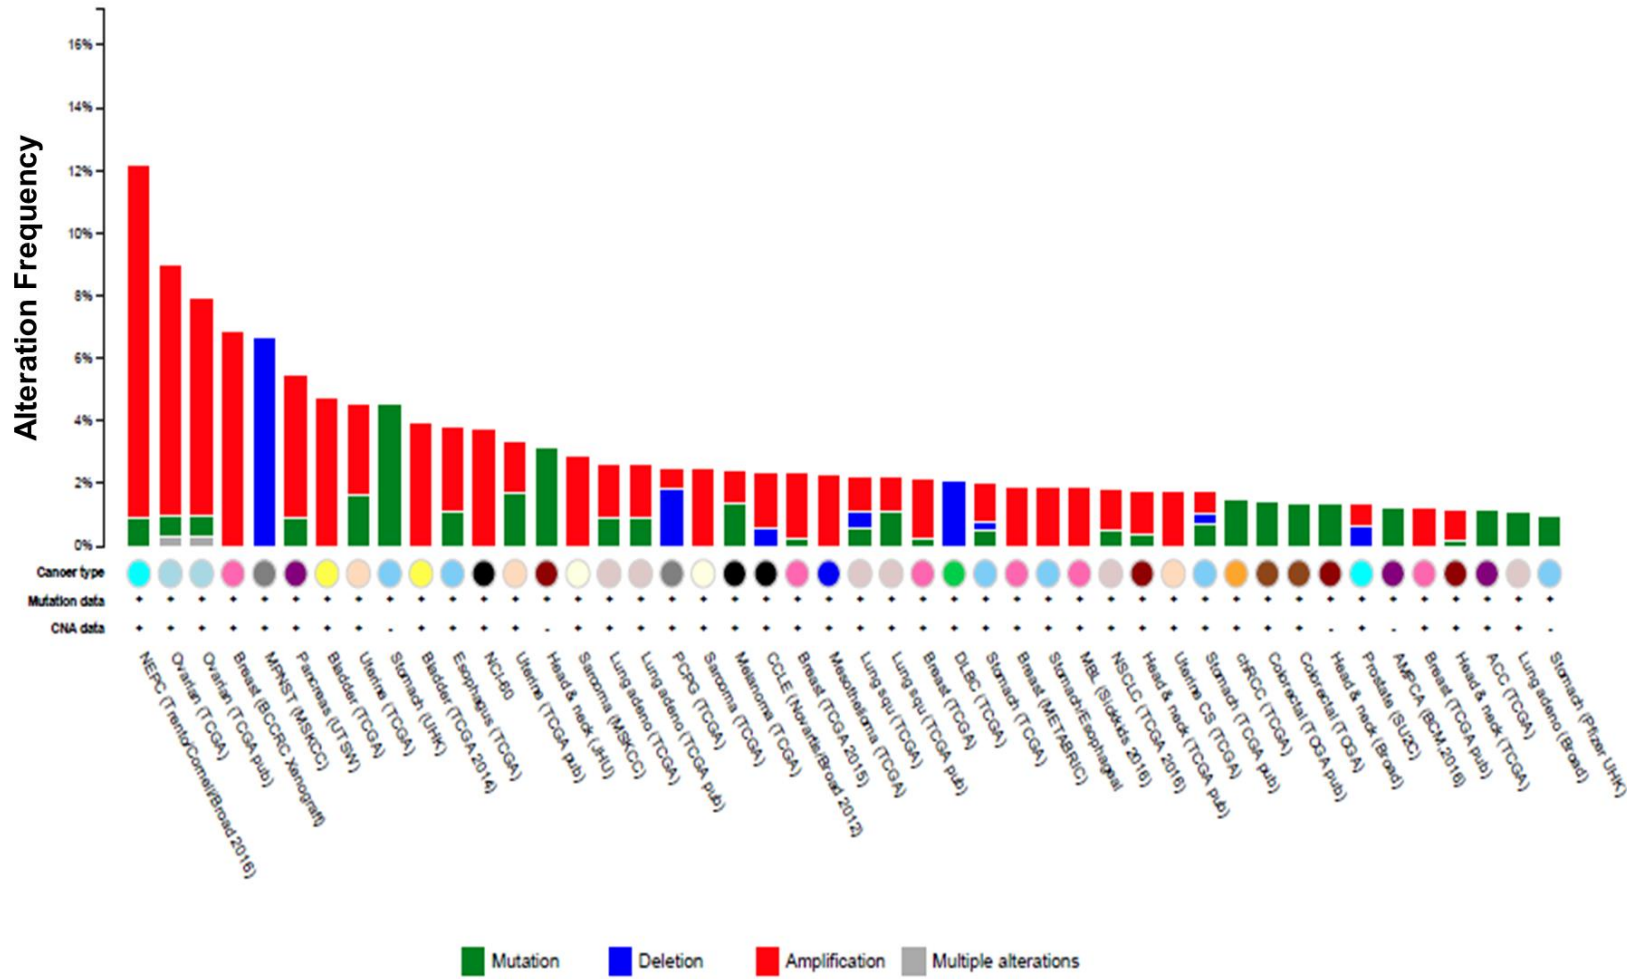

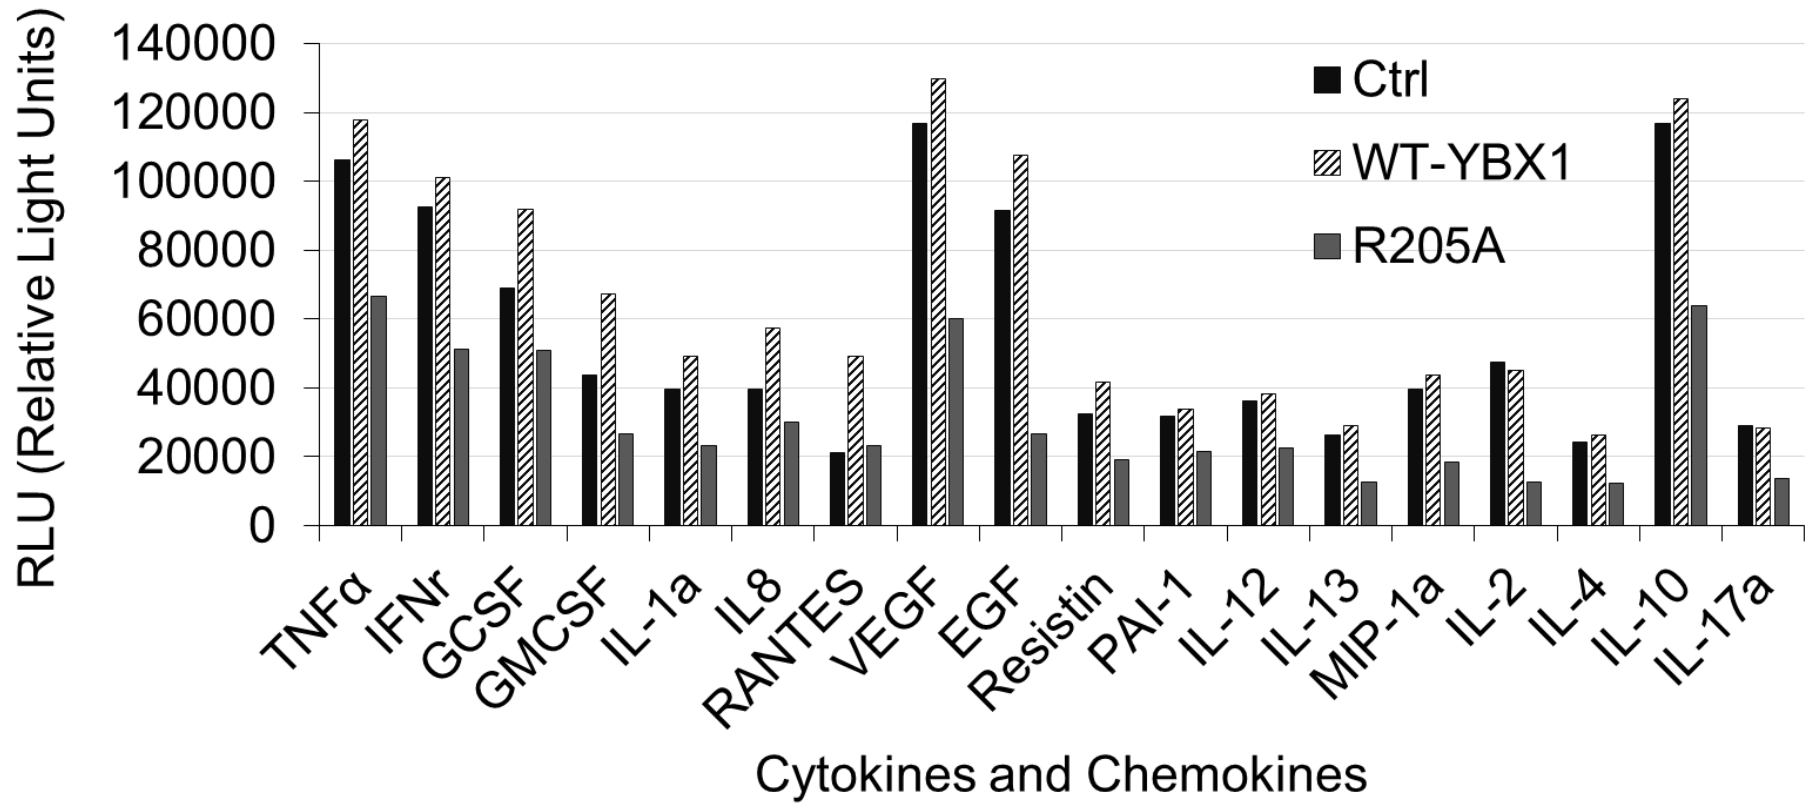

Supplement: 41598_2020_72942_MOESM2_ESM.pdf [file 41598_2020_72942_MOESM2_ESM.pdf]
